# Supplementary material for: Development of an HPLC Method for Absolute Quantification and QAMS of Flavonoids Components inPsoralea corylifoliaL.
Source: Hindawi journal article supplement (doi:10.1155/2015/792637), 2015-01-01

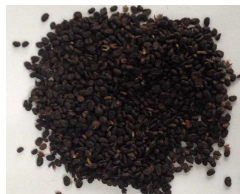

*Psoralea corylifolia* L.

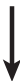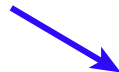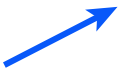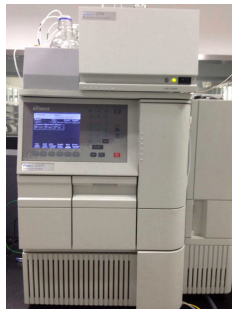

**QAMS**

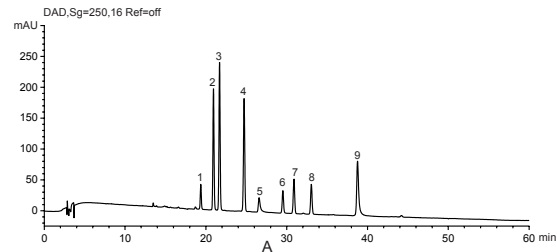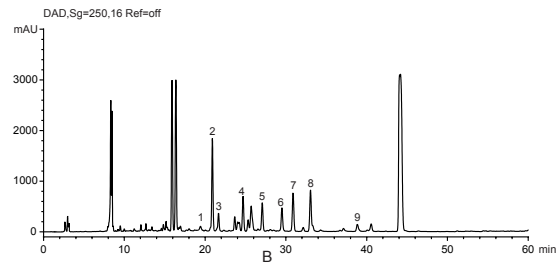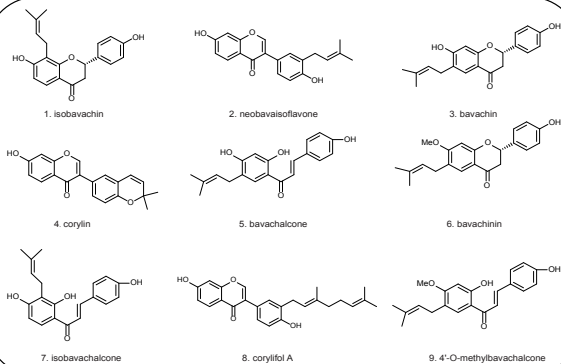

Supplement: f1 [file 792637.f1.pdf]
